# Supplementary material for: Small RNA Library Preparation Method for Next-Generation Sequencing Using Chemical Modifications to Prevent Adapter Dimer Formation
Source: PubMed Central journal article supplement (PMC5119831; doi:10.1371/journal.pone.0167009), 2016-11-22
Supplement: pone.0167009.s006.pdf [file pone.0167009.s006.pdf]

## S1 File

### Analysis of Bioanalyzer Peaks Generated From sRNA Library Preparation

We explored the origin of any major peaks shown in a bioanalyzer trace to ensure lower molecular weight peaks would not amplify on the flow cell and to identify the variety of small RNA species tagged in this workflow. Further investigation revealed specific identities for many of the peaks in the bioanalyzer trace (**S1 File Fig1**). The following peak sizes correspond to single stranded oligonucleotides as demonstrated by running individual oligonucleotides in water on a BioAnalyzer high sensitivity DNA chip: RT Primer (33 nt), 35 nt Marker (35 nt), 3' Adapter (40 nt), 5' Adapter (42 nt), Forward PCR Primer (73 nt), and Reverse PCR Primer (82 nt) (**S1 File Fig2**).

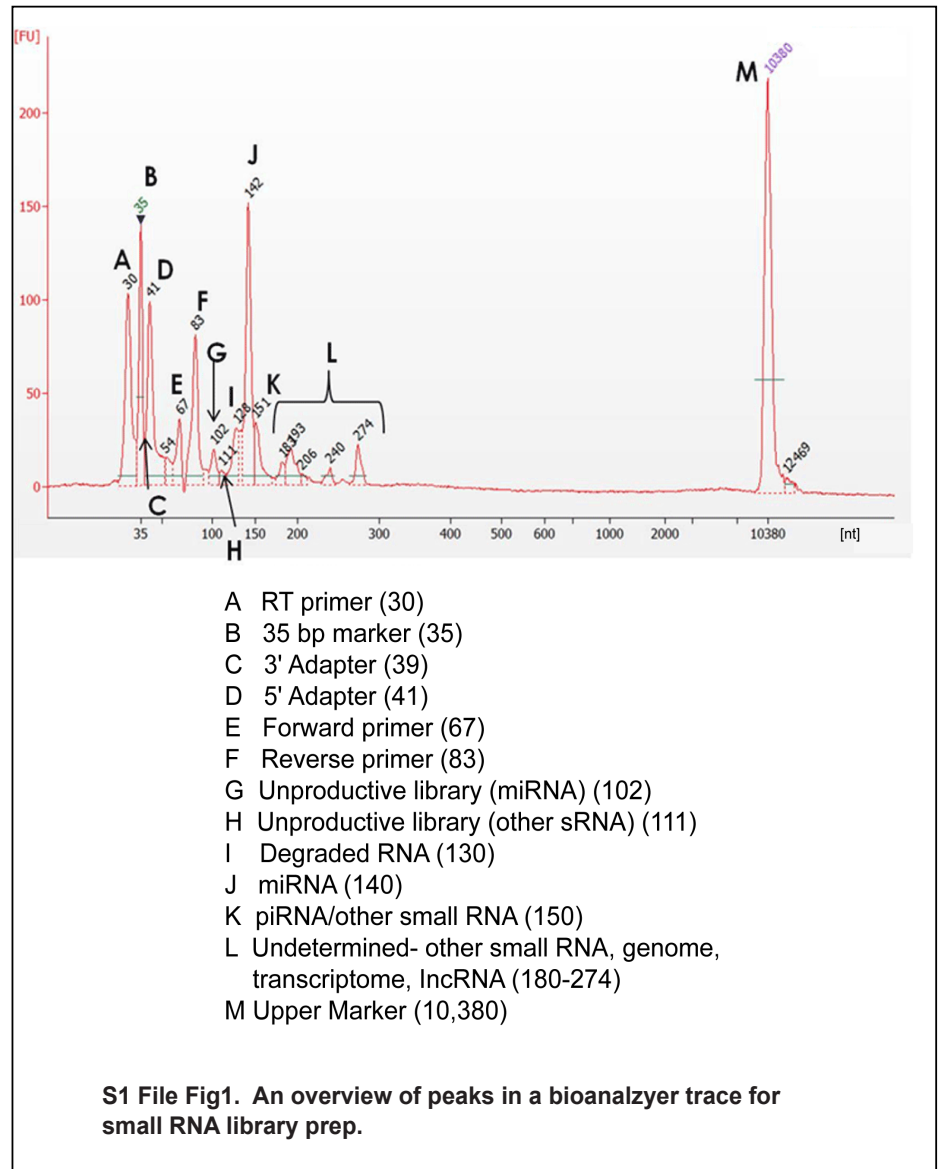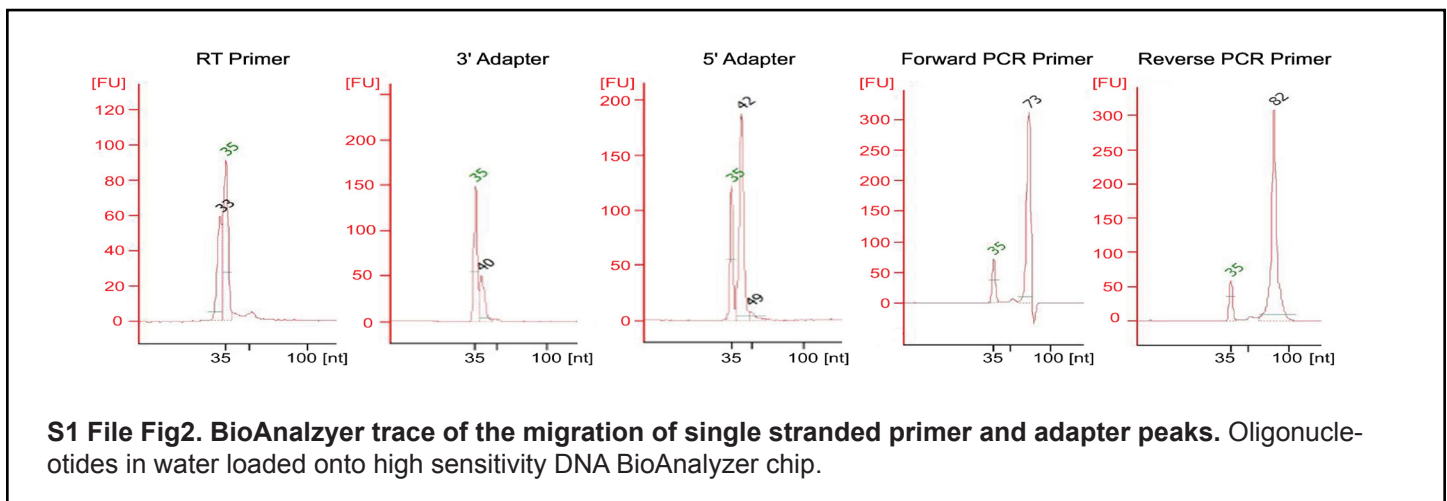



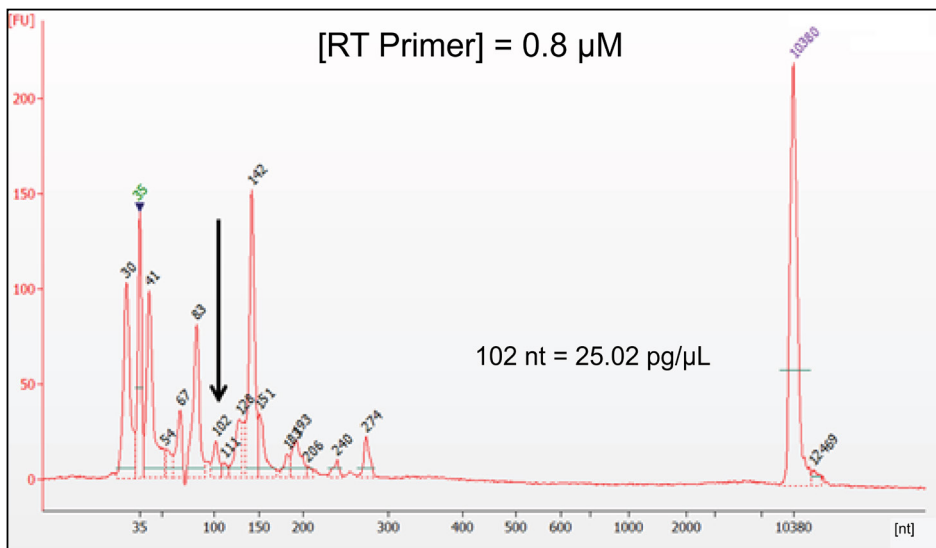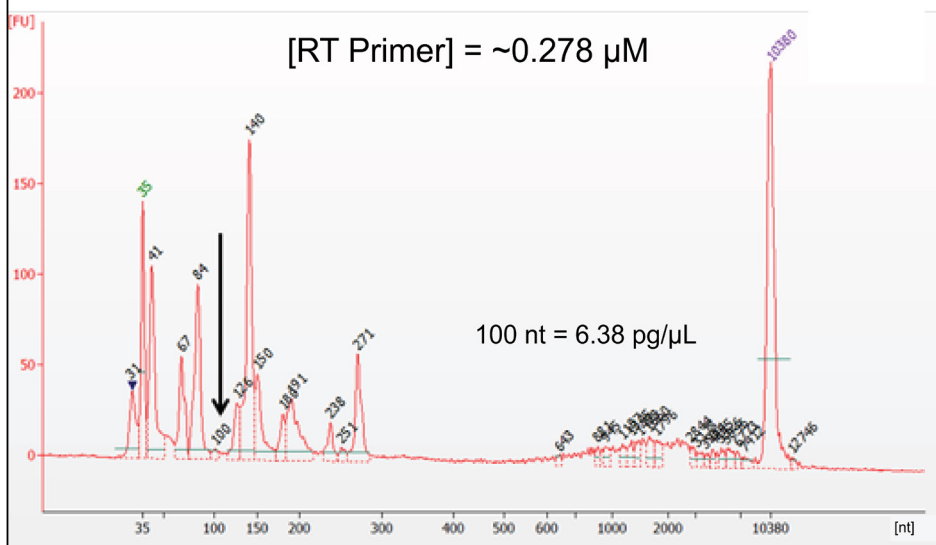

prevent loss of miRNA to unproductive libraries (**S1 File Fig4**). This truncated library side reaction can vary considerably from one reaction to the next. The undesired adapter dimer side product runs at 120 nt and is a peak that is often not present in the CleanTag workflow. Next there is a peak which runs as a small shoulder around 130 nt directly in front of the main miRNA library peak. We speculate that this peak is due to degraded RNA species that are around 10 nt in length. These fragments typically get filtered out in bioinformatic analysis because they do not meet the length threshold of 15 nt and are considered “junk”. It is unclear whether these could actually be smaller distinct RNA species of regulatory importance [2]. Tagged miRNA libraries

**S1 File Fig4. High RT primer concentration causes non-productive library peak.** Bioanalyzer traces of crude small RNA libraries prepared using 1000 ng human total brain RNA input with CleanTag workflow. A) High RT primer concentration results in more truncated library formation at 100 nt. B) Lower RT primer concentration results in a decrease of truncated library formation.

that have been amplified with forward and reverse PCR primers run at 140 nt while the 150 nt peak contains several tagged small RNA types such as piRNA, tRNA etc. The 150 nt peak can vary in amount significantly from one sample type to the next and from one library preparation to the next even within the same sample type. The region of 180-275 nt is less characterized and we tentatively attribute these peaks to be potential longer fragments of the transcriptome. Overall, it is important when analyzing bioanalyzer traces to observe a pattern rather than specific peak sizes. Sizes of peaks can shift on a bioanalyzer trace by 10-20 nt in any given chip run.
